# Supplementary material for: A comprehensive landscape analysis of autophagy in cancer development and drug resistance
Source: PubMed Central journal article supplement (PMC11381251; doi:10.3389/fimmu.2024.1412781), 2024-08-26
Supplement: DataSheet2.pdf [file DataSheet2.pdf]

Table S2 The survival analysis of hub genes in the TCGA Pancancer datasets

| Gene in pan-cancer   | OS       | HR    | Lower | Upper | Hazard Ratio(95%CI) |
|----------------------|----------|-------|-------|-------|---------------------|
| <b>ULK1</b>          |          |       |       |       |                     |
| CancerCode           | pvalue   | HR    | Lower | Upper | Hazard Ratio(95%CI) |
| TCGA-SKCM(N=444)     | 0.01     | 1.29  | 1.06  | 1.57  | 1.29(1.06,1.57)     |
| TCGA-KIRC(N=515)     | 0.05     | 1.23  | 1.00  | 1.50  | 1.23(1.00,1.50)     |
| TCGA-THCA(N=501)     | 0.05     | 3.15  | 1.01  | 9.83  | 3.15(1.01,9.83)     |
| TCGA-SKCM-P(N=97)    | 0.09     | 1.73  | 0.91  | 3.26  | 1.73(0.91,3.26)     |
| TCGA-LAML(N=209)     | 0.1      | 1.17  | 0.97  | 1.42  | 1.17(0.97,1.42)     |
| TCGA-LUSC(N=468)     | 0.13     | 1.13  | 0.96  | 1.33  | 1.13(0.96,1.33)     |
| TCGA-BRCA(N=1044)    | 0.13     | 1.32  | 0.92  | 1.91  | 1.32(0.92-1.91)     |
| TCGA-OV(N=407)       | 0.07     | 1.27  | 0.98  | 1.65  | 1.27(0.98,1.65)     |
| TCGA-UCEC(N=166)     | 0.14     | 1.74  | 0.82  | 3.69  | 1.74(0.82,3.69)     |
| TCGA-GBMLGG(N=615)   | 0.0019   | 0.73  | 0.60  | 0.89  | 0.73(0.60,0.89)     |
| TCGA-PAAD(N=172)     | 0.01     | 0.74  | 0.58  | 0.94  | 0.74(0.58,0.94)     |
| <b>ULK2</b>          |          |       |       |       |                     |
| CancerCode           | pvalue   | HR    | Lower | Upper | Hazard Ratio(95%CI) |
| TCGA-BLCA(N=398)     | 0.0093   | 1.20  | 1.05  | 1.38  | 1.20(1.05,1.38)     |
| TCGA-LAML(N=209)     | 0.02     | 1.15  | 1.03  | 1.28  | 1.15(1.03,1.28)     |
| TCGA-BRCA(N=1044)    | 0.05     | 1.45  | 1.00  | 2.10  | 1.45(1.00,2.10)     |
| TCGA-GBMLGG(N=615)   | 0.000098 | 0.76  | 0.66  | 0.87  | 0.76(0.66,0.87)     |
| TCGA-KIRP(N=276)     | 0.00011  | 0.64  | 0.51  | 0.80  | 0.64(0.51,0.80)     |
| TCGA-MESO(N=84)      | 0.01     | 0.71  | 0.54  | 0.93  | 0.71(0.54,0.93)     |
| TCGA-KIRC(N=515)     | 0.04     | 0.82  | 0.69  | 0.99  | 0.82(0.69,0.99)     |
| TCGA-OV(N=407)       | 0.08     | 0.91  | 0.81  | 1.01  | 0.91(0.81,1.01)     |
| <b>ATG7</b>          |          |       |       |       |                     |
| CancerCode           | pvalue   | HR    | Lower | Upper | Hazard Ratio(95%CI) |
| TCGA-GBMLGG(N=615)   | 4.1E-06  | 2.05  | 1.52  | 2.77  | 2.05(1.52,2.77)     |
| TCGA-LIHC(N=341)     | 0.00069  | 1.79  | 1.28  | 2.50  | 1.79(1.28,2.50)     |
| TCGA-KICH(N=64)      | 0.0045   | 12.81 | 2.07  | 79.34 | 12.81(2.07,79.34)   |
| TCGA-LAML(N=209)     | 0.0086   | 1.17  | 1.04  | 1.31  | 1.17(1.04,1.31)     |
| TCGA-LGG(N=474)      | 0.02     | 1.78  | 1.12  | 2.85  | 1.78(1.12,2.85)     |
| TCGA-PAAD(N=172)     | 0.03     | 1.60  | 1.06  | 2.44  | 1.60(1.06,2.44)     |
| TCGA-THYM(N=117)     | 0.05     | 6.48  | 0.96  | 43.58 | 6.48(0.96,43.58)    |
| TCGA-BRCA(N=1044)    | 0.00095  | 1.75  | 1.25  | 2.44  | 1.75(1.25,2.44)     |
| TCGA-BLCA(N=398)     | 0.04     | 1.41  | 1.01  | 1.97  | 1.41(1.01,1.97)     |
| TCGA-OV(N=407)       | 0.01     | 1.41  | 1.07  | 1.87  | 1.41(1.07-1.87)     |
| TCGA-KIRC(N=515)     | 0.00083  | 0.64  | 0.49  | 0.83  | 0.64(0.49,0.83)     |
| TCGA-COADREAD(N=380) | 0.01     | 0.59  | 0.38  | 0.90  | 0.59(0.38,0.90)     |
| TCGA-READ(N=90)      | 0.01     | 0.34  | 0.15  | 0.78  | 0.34(0.15,0.78)     |
| TCGA-UCEC(N=166)     | 0.02     | 0.45  | 0.24  | 0.87  | 0.45(0.24,0.87)     |
| TCGA-KIPAN(N=855)    | 0.02     | 0.78  | 0.63  | 0.96  | 0.78(0.63,0.96)     |
| <b>CDKN1A</b>        |          |       |       |       |                     |
| CancerCode           | pvalue   | HR    | Lower | Upper | Hazard Ratio(95%CI) |
| TCGA-GBMLGG(N=615)   | 4E-09    | 1.31  | 1.20  | 1.44  | 1.31(1.20,1.44)     |
| TCGA-LUSC(N=468)     | 0.0089   | 1.26  | 1.06  | 1.49  | 1.26(1.06,1.49)     |
| TCGA-BRCA(N=1044)    | 0.0036   | 1.64  | 1.17  | 2.31  | 1.64(1.17,2.31)     |
| TCGA-LGG(N=474)      | 0.02     | 1.16  | 1.02  | 1.32  | 1.16(1.02,1.32)     |
| TCGA-MESO(N=84)      | 0.02     | 1.30  | 1.04  | 1.62  | 1.30(1.04,1.62)     |
| TCGA-UVM(N=74)       | 0.02     | 1.43  | 1.06  | 1.93  | 1.43(1.06,1.93)     |
| TCGA-DLBC(N=44)      | 0.02     | 1.86  | 1.06  | 3.24  | 1.86(1.06,3.24)     |
| TCGA-PAAD(N=172)     | 0.03     | 1.38  | 1.02  | 1.85  | 1.38(1.02,1.85)     |
| TCGA-KIRC(N=515)     | 0.000038 | 0.69  | 0.58  | 0.82  | 0.69(0.58,0.82)     |
| TCGA-KIPAN(N=855)    | 0.0003   | 0.81  | 0.72  | 0.91  | 0.81(0.72,0.91)     |
| TCGA-KIRP(N=276)     | 0.003    | 0.69  | 0.54  | 0.88  | 0.69(0.54,0.88)     |
| TCGA-COAD(N=278)     | 0.2      | 0.86  | 0.69  | 1.08  | 0.86(0.69,1.08)     |
| <b>CAMKK2</b>        |          |       |       |       |                     |
| CancerCode           | pvalue   | HR    | Lower | Upper | Hazard Ratio(95%CI) |

|                    |               |           |              |              |                            |
|--------------------|---------------|-----------|--------------|--------------|----------------------------|
| TCGA-LAML(N=209)   | 0.03          | 1.17      | 1.01         | 1.36         | 1.17(1.01,1.36)            |
| TCGA-UVM(N=74)     | 0.05          | 2.03      | 0.99         | 4.17         | 2.03(0.99,4.17)            |
| TCGA-PAAD(N=172)   | 0.05          | 1.41      | 1.00         | 1.98         | 1.41(1.00,1.98)            |
| TCGA-MESO(N=84)    | 0.06          | 1.49      | 0.99         | 2.26         | 1.49(0.99,2.26)            |
| TCGA-ACC(N=77)     | 0.06          | 1.49      | 0.98         | 2.24         | 1.49(0.98,2.24)            |
| TCGA-BRCA(N=1044)  | 0.11          | 1.31      | 0.94         | 1.83         | 1.31(0.94,1.83)            |
| TCGA-GBMLGG(N=615) | 0.0069        | 0.81      | 0.70         | 0.94         | 0.81(0.70,0.94)            |
| TARGET-NB(N=151)   | 0.04          | 0.70      | 0.49         | 0.99         | 0.70(0.49,0.99)            |
| <b>GABARAPL1</b>   |               |           |              |              |                            |
| <b>CancerCode</b>  | <b>pvalue</b> | <b>HR</b> | <b>Lower</b> | <b>Upper</b> | <b>Hazard Ratio(95%CI)</b> |
| TCGA-STES(N=547)   | 0.01          | 1.19      | 1.04         | 1.37         | 1.19(1.04,1.37)            |
| TCGA-STAD(N=372)   | 0.01          | 1.25      | 1.05         | 1.48         | 1.25(1.05,1.48)            |
| TCGA-BRCA(N=1044)  | 0.01          | 1.64      | 1.10         | 2.44         | 1.64(1.10,2.44)            |
| TCGA-OV(N=407)     | 0.0024        | 1.52      | 1.16         | 2.00         | 1.52(1.16,2.00)            |
| TCGA-GBMLGG(N=615) | 3.8E-16       | 0.51      | 0.44         | 0.60         | 0.51(0.44,0.60)            |
| TCGA-KIPAN(N=855)  | 6.3E-08       | 0.69      | 0.60         | 0.79         | 0.69(0.60,0.79)            |
| TCGA-UVM(N=74)     | 0.00041       | 0.32      | 0.17         | 0.60         | 0.32(0.17,0.60)            |
| TCGA-KIRC(N=515)   | 0.0029        | 0.75      | 0.62         | 0.90         | 0.75(0.62,0.90)            |
| TCGA-LIHC(N=341)   | 0.0033        | 0.81      | 0.70         | 0.93         | 0.81(0.70,0.93)            |
| TCGA-LGG(N=474)    | 0.02          | 0.72      | 0.55         | 0.95         | 0.72(0.55,0.95)            |
| TCGA-KICH(N=64)    | 0.02          | 0.49      | 0.26         | 0.92         | 0.49(0.26,0.92)            |
| <b>GABARAPL2</b>   |               |           |              |              |                            |
| <b>CancerCode</b>  | <b>pvalue</b> | <b>HR</b> | <b>Lower</b> | <b>Upper</b> | <b>Hazard Ratio(95%CI)</b> |
| TARGET-LAML(N=142) | 0.000055      | 1.61      | 1.28         | 2.04         | 1.61(1.28,2.04)            |
| TCGA-STES(N=547)   | 0.0003        | 1.78      | 1.30         | 2.43         | 1.78(1.30,2.43)            |
| TCGA-STAD(N=372)   | 0.002         | 1.88      | 1.26         | 2.81         | 1.88(1.26,2.81)            |
| TCGA-HNSC(N=509)   | 0.0052        | 1.52      | 1.13         | 2.04         | 1.52(1.13,2.04)            |
| TCGA-BRCA(N=1044)  | 0.01          | 1.42      | 1.08         | 1.88         | 1.42(1.08,1.88)            |
| TCGA-PCPG(N=170)   | 0.02          | 21.06     | 1.69         | 262.81       | 21.06(1.69,262.81)         |
| TCGA-ESCA(N=175)   | 0.04          | 1.66      | 1.02         | 2.69         | 1.66(1.02,2.69)            |
| TCGA-BLCA(N=398)   | 0.06          | 1.42      | 0.98         | 2.06         | 1.42(0.98,2.06)            |
| TCGA-GBMLGG(N=615) | 6.6E-08       | 0.49      | 0.38         | 0.63         | 0.49(0.38,0.63)            |
| TCGA-KIPAN(N=855)  | 6.9E-07       | 0.58      | 0.47         | 0.72         | 0.58(0.47,0.72)            |
| TCGA-KIRC(N=515)   | 7.8E-07       | 0.51      | 0.39         | 0.67         | 0.51(0.39,0.67)            |
| TCGA-SKCM(N=444)   | 0.0054        | 0.74      | 0.60         | 0.92         | 0.74(0.60,0.92)            |
| TCGA-LGG(N=474)    | 0.01          | 0.55      | 0.35         | 0.88         | 0.55(0.35,0.88)            |
| TCGA-SKCM-M(N=347) | 0.01          | 0.73      | 0.57         | 0.94         | 0.73(0.57,0.94)            |
| TCGA-PAAD(N=172)   | 0.05          | 0.69      | 0.48         | 0.99         | 0.69(0.48,0.99)            |
| <b>ABCA2</b>       |               |           |              |              |                            |
| <b>CancerCode</b>  | <b>pvalue</b> | <b>HR</b> | <b>Lower</b> | <b>Upper</b> | <b>Hazard Ratio(95%CI)</b> |
| TCGA-BRCA(N=1044)  | 0.0048        | 1.63      | 1.16         | 2.29         | 1.63(1.16,2.29)            |
| TCGA-LUSC(N=468)   | 0.0062        | 1.61      | 1.14         | 2.26         | 1.61(1.14,2.26)            |
| TCGA-COAD(N=278)   | 0.0068        | 1.92      | 1.19         | 3.10         | 1.92(1.19,3.10)            |
| TCGA-PRAD(N=492)   | 0.04          | 3.26      | 1.07         | 9.91         | 3.26(1.07,9.91)            |
| TCGA-BLCA(N=398)   | 0.04          | 1.39      | 1.01         | 1.92         | 1.39(1.01,1.92)            |
| TCGA-COADREAD(N=   | 0.01          | 1.71      | 1.11         | 2.62         | 1.71(1.11,2.62)            |
| TCGA-LIHC(N=341)   | 0.02          | 1.54      | 1.08         | 2.20         | 1.54(1.08,2.20)            |
| TCGA-GBMLGG(N=615) | 2.9E-07       | 0.72      | 0.64         | 0.82         | 0.72(0.64,0.82)            |
| TCGA-PAAD(N=172)   | 0.0064        | 0.73      | 0.58         | 0.91         | 0.73(0.58,0.91)            |
| TCGA-KIPAN(N=855)  | 0.02          | 0.84      | 0.73         | 0.98         | 0.84(0.73,0.98)            |
| TCGA-CESC(N=273)   | 0.0027        | 0.49      | 0.30         | 0.79         | 0.49(0.30,0.79)            |
| <b>ABCA3</b>       |               |           |              |              |                            |
| <b>CancerCode</b>  | <b>pvalue</b> | <b>HR</b> | <b>Lower</b> | <b>Upper</b> | <b>Hazard Ratio(95%CI)</b> |
| TCGA-STAD(N=372)   | 0.03          | 1.12      | 1.01         | 1.24         | 1.12(1.01,1.24)            |
| TCGA-LUSC(N=468)   | 0.03          | 1.08      | 1.01         | 1.16         | 1.08(1.01,1.16)            |
| TCGA-STES(N=547)   | 0.05          | 1.08      | 1.00         | 1.18         | 1.08(1.00,1.18)            |
| TCGA-COADREAD(N=   | 0.0032        | 1.92      | 1.23         | 2.99         | 1.92(1.23,2.99)            |
| TCGA-COAD(N=278)   | 0.06          | 1.59      | 0.97         | 2.60         | 1.59(0.97,2.60)            |

|                    |         |      |      |       |                  |
|--------------------|---------|------|------|-------|------------------|
| TCGA-PRAD(N=492)   | 0.08    | 2.88 | 0.83 | 10.05 | 2.88(0.83,10.05) |
| TCGA-UCEC(N=166)   | 0.05    | 2.16 | 0.97 | 4.80  | 2.16(0.97,4.80)  |
| TCGA-BLCA(N=398)   | 0.14    | 1.26 | 0.93 | 1.72  | 1.26(0.93,1.72)  |
| TCGA-GBMLGG(N=615) | 4E-27   | 0.57 | 0.51 | 0.63  | 0.57(0.51,0.63)  |
| TCGA-LUAD(N=490)   | 0.00035 | 0.87 | 0.80 | 0.94  | 0.87(0.80,0.94)  |
| TCGA-ACC(N=77)     | 0.0005  | 0.64 | 0.50 | 0.82  | 0.64(0.50,0.82)  |
| TCGA-LGG(N=474)    | 0.0026  | 0.57 | 0.40 | 0.82  | 0.57(0.40,0.82)  |
| TCGA-UVM(N=74)     | 0.0033  | 0.54 | 0.35 | 0.82  | 0.54(0.35,0.82)  |
| TCGA-PAAD(N=172)   | 0.0077  | 0.77 | 0.64 | 0.93  | 0.77(0.64,0.93)  |
| TCGA-KIRC(N=515)   | 0.01    | 0.79 | 0.65 | 0.95  | 0.79(0.65,0.95)  |
| TCGA-SKCM-P(N=97)  | 0.01    | 0.70 | 0.53 | 0.93  | 0.70(0.53,0.93)  |
| TCGA-CHOL(N=33)    | 0.02    | 0.60 | 0.38 | 0.92  | 0.60(0.38,0.92)  |
| TCGA-KIPAN(N=855)  | 0.03    | 0.85 | 0.74 | 0.98  | 0.85(0.74,0.98)  |

#### ABCB1

| CancerCode         | pvalue  | HR   | Lower | Upper | Hazard Ratio(95%CI) |
|--------------------|---------|------|-------|-------|---------------------|
| TCGA-LAML(N=209)   | 0.09    | 1.07 | 0.99  | 1.16  | 1.07(0.99,1.16)     |
| TCGA-SKCM(N=444)   | 5.3E-07 | 0.80 | 0.73  | 0.87  | 0.80(0.73,0.87)     |
| TCGA-SKCM-M(N=347) | 1.7E-06 | 0.79 | 0.72  | 0.87  | 0.79(0.72,0.87)     |
| TCGA-GBMLGG(N=615) | 7.9E-06 | 0.69 | 0.59  | 0.81  | 0.69(0.59,0.81)     |
| TCGA-KIRC(N=515)   | 0.00037 | 0.87 | 0.80  | 0.94  | 0.87(0.80,0.94)     |
| TCGA-SARC(N=254)   | 0.0067  | 0.85 | 0.76  | 0.96  | 0.85(0.76,0.96)     |
| TCGA-HNSC(N=509)   | 0.01    | 0.91 | 0.84  | 0.98  | 0.91(0.84,0.98)     |
| TCGA-PAAD(N=172)   | 0.02    | 0.85 | 0.75  | 0.97  | 0.85(0.75,0.97)     |
| TCGA-MESO(N=84)    | 0.04    | 0.85 | 0.73  | 0.99  | 0.85(0.73,0.99)     |
| TCGA-BRCA(N=1044)  | 0.05    | 0.90 | 0.80  | 1.00  | 0.90(0.80,1.00)     |
| TCGA-LUAD(N=490)   | 0.07    | 0.88 | 0.76  | 1.01  | 0.88(0.76,1.01)     |
| TCGA-CESC(N=273)   | 0.09    | 0.85 | 0.71  | 1.02  | 0.85(0.71,1.02)     |
| TCGA-OV(N=407)     | 0.13    | 0.92 | 0.83  | 1.02  | 0.92(0.83,1.02)     |

#### ABCC3

| CancerCode         | pvalue  | HR   | Lower | Upper | Hazard Ratio(95%CI) |
|--------------------|---------|------|-------|-------|---------------------|
| TCGA-GBMLGG(N=615) | 3E-58   | 1.42 | 1.36  | 1.49  | 1.42(1.36,1.49)     |
| TCGA-LGG(N=474)    | 1.5E-20 | 1.37 | 1.28  | 1.46  | 1.37(1.28,1.46)     |
| TCGA-KIPAN(N=855)  | 4.4E-06 | 1.19 | 1.11  | 1.29  | 1.19(1.11,1.29)     |
| TCGA-UVM(N=74)     | 0.0031  | 1.42 | 1.12  | 1.80  | 1.42(1.12,1.80)     |
| TCGA-PAAD(N=172)   | 0.0037  | 1.24 | 1.07  | 1.43  | 1.24(1.07,1.43)     |
| TCGA-KIRP(N=276)   | 0.02    | 1.30 | 1.05  | 1.61  | 1.30(1.05,1.61)     |
| TCGA-HNSC(N=509)   | 0.02    | 1.13 | 1.02  | 1.26  | 1.13(1.02,1.26)     |
| TCGA-GBM(N=144)    | 0.03    | 1.12 | 1.01  | 1.24  | 1.12(1.01,1.24)     |
| TCGA-LIHC(N=341)   | 0.03    | 1.20 | 1.02  | 1.41  | 1.20(1.02,1.41)     |
| TCGA-BLCA(N=398)   | 0.01    | 0.91 | 0.84  | 0.98  | 0.91(0.84,0.98)     |
| TCGA-SKCM-M(N=347) | 0.02    | 0.90 | 0.82  | 0.98  | 0.90(0.82,0.98)     |
| TCGA-SKCM(N=444)   | 0.03    | 0.91 | 0.84  | 0.99  | 0.91(0.84,0.99)     |
| TCGA-BRCA(N=1044)  | 0.04    | 0.71 | 0.51  | 0.98  | 0.71(0.51,0.98)     |

#### ABCG1

| CancerCode         | pvalue   | HR   | Lower | Upper | Hazard Ratio(95%CI) |
|--------------------|----------|------|-------|-------|---------------------|
| TCGA-STAD(N=372)   | 0.0051   | 1.26 | 1.07  | 1.47  | 1.26(1.07,1.47)     |
| TCGA-STES(N=547)   | 0.01     | 1.18 | 1.04  | 1.35  | 1.18(1.04,1.35)     |
| TCGA-LAML(N=209)   | 0.01     | 1.16 | 1.04  | 1.31  | 1.16(1.04,1.31)     |
| TCGA-LIHC(N=341)   | 0.03     | 1.15 | 1.01  | 1.30  | 1.15(1.01,1.30)     |
| TCGA-PRAD(N=492)   | 0.05     | 2.42 | 1.00  | 5.81  | 2.42(1.00,5.81)     |
| TCGA-BRCA(N=1044)  | 0.05     | 1.41 | 0.99  | 2.01  | 1.41(0.99,2.01)     |
| TCGA-GBMLGG(N=615) | 2.8E-13  | 0.58 | 0.50  | 0.67  | 0.58(0.50,0.67)     |
| TCGA-KIRC(N=515)   | 1.6E-08  | 0.64 | 0.55  | 0.75  | 0.64(0.55,0.75)     |
| TCGA-KIPAN(N=855)  | 0.000054 | 0.79 | 0.70  | 0.88  | 0.79(0.70,0.88)     |
| TCGA-SKCM-M(N=347) | 0.0013   | 0.85 | 0.77  | 0.94  | 0.85(0.77,0.94)     |
| TCGA-SKCM(N=444)   | 0.0017   | 0.86 | 0.79  | 0.95  | 0.86(0.79,0.95)     |
| TARGET-ALL(N=86)   | 0.0025   | 0.76 | 0.63  | 0.91  | 0.76(0.63,0.91)     |
| TCGA-LGG(N=474)    | 0.0031   | 0.70 | 0.55  | 0.89  | 0.70(0.55,0.89)     |

|                    |               |           |              |              |                            |
|--------------------|---------------|-----------|--------------|--------------|----------------------------|
| TCGA-KIRP(N=276)   | 0.02          | 0.75      | 0.58         | 0.96         | 0.75(0.58,0.96)            |
| TCGA-CESC(N=273)   | 0.04          | 0.61      | 0.38         | 0.98         | 0.61(0.38,0.98)            |
| <b>ABCG2</b>       |               |           |              |              |                            |
| <b>CancerCode</b>  | <b>pvalue</b> | <b>HR</b> | <b>Lower</b> | <b>Upper</b> | <b>Hazard Ratio(95%CI)</b> |
| TCGA-BLCA(N=398)   | 0.07          | 1.09      | 0.99         | 1.19         | 1.09(0.99,1.19)            |
| TCGA-BRCA(N=1044)  | 0.06          | 1.36      | 0.98         | 1.90         | 1.36(0.98,1.90)            |
| TCGA-KIRC(N=515)   | 2.5E-13       | 0.70      | 0.64         | 0.77         | 0.70(0.64,0.77)            |
| TCGA-GBMLGG(N=615) | 3.6E-08       | 0.65      | 0.55         | 0.75         | 0.65(0.55,0.75)            |
| TCGA-KIPAN(N=855)  | 0.0084        | 0.91      | 0.85         | 0.98         | 0.91(0.85,0.98)            |
| TCGA-GBM(N=144)    | 0.01          | 0.78      | 0.64         | 0.95         | 0.78(0.64,0.95)            |
| TCGA-PAAD(N=172)   | 0.05          | 0.85      | 0.72         | 1.00         | 0.85(0.72,1.00)            |
| <b>ABCG4</b>       |               |           |              |              |                            |
| <b>CancerCode</b>  | <b>pvalue</b> | <b>HR</b> | <b>Lower</b> | <b>Upper</b> | <b>Hazard Ratio(95%CI)</b> |
| TCGA-STAD(N=372)   | 0.0015        | 1.25      | 1.09         | 1.43         | 1.25(1.09,1.43)            |
| TCGA-MESO(N=84)    | 0.0057        | 1.23      | 1.06         | 1.42         | 1.23(1.06,1.42)            |
| TCGA-STES(N=547)   | 0.02          | 1.12      | 1.02         | 1.24         | 1.12(1.02,1.24)            |
| TCGA-SKCM(N=444)   | 0.02          | 1.10      | 1.02         | 1.19         | 1.10(1.02,1.19)            |
| TCGA-UCEC(N=166)   | 0.03          | 1.22      | 1.02         | 1.47         | 1.22(1.02,1.47)            |
| TCGA-BLCA(N=398)   | 0.03          | 1.11      | 1.01         | 1.22         | 1.11(1.01,1.22)            |
| TCGA-BRCA(N=1044)  | 0.06          | 1.14      | 1.00         | 1.31         | 1.14(1.00,1.31)            |
| <b>ABCF2</b>       |               |           |              |              |                            |
| <b>CancerCode</b>  | <b>pvalue</b> | <b>HR</b> | <b>Lower</b> | <b>Upper</b> | <b>Hazard Ratio(95%CI)</b> |
| TCGA-GBMLGG(N=615) | 2.3E-12       | 2.77      | 2.09         | 3.68         | 2.77(2.09,3.68)            |
| TCGA-LIHC(N=341)   | 0.00015       | 1.69      | 1.29         | 2.21         | 1.69(1.29,2.21)            |
| TCGA-LGG(N=474)    | 0.0017        | 1.96      | 1.29         | 2.97         | 1.96(1.29,2.97)            |
| TCGA-LAML(N=209)   | 0.0026        | 1.25      | 1.08         | 1.46         | 1.25(1.08,1.46)            |
| TCGA-KICH(N=64)    | 0.0028        | 19.75     | 3.18         | 122.66       | 19.75(3.18,122.66)         |
| TCGA-BLCA(N=398)   | 0.0084        | 1.39      | 1.09         | 1.77         | 1.39(1.09,1.77)            |
| TCGA-LUAD(N=490)   | 0.0053        | 1.53      | 1.13         | 2.06         | 1.53(1.13,2.06)            |
| TCGA-BRCA(N=1044)  | 0.02          | 1.54      | 1.05         | 2.26         | 1.54(1.05,2.26)            |
| TCGA-KIRC(N=515)   | 0.05          | 0.77      | 0.59         | 1.00         | 0.77(0.59,1.00)            |
| <b>MMP9</b>        |               |           |              |              |                            |
| <b>CancerCode</b>  | <b>pvalue</b> | <b>HR</b> | <b>Lower</b> | <b>Upper</b> | <b>Hazard Ratio(95%CI)</b> |
| TCGA-GBMLGG(N=615) | 1.4E-41       | 1.28      | 1.23         | 1.33         | 1.28(1.23,1.33)            |
| TCGA-KIPAN(N=855)  | 4.5E-06       | 1.15      | 1.08         | 1.22         | 1.15(1.08,1.22)            |
| TCGA-UVM(N=74)     | 7.4E-06       | 1.63      | 1.32         | 2.02         | 1.63(1.32,2.02)            |
| TCGA-LGG(N=474)    | 0.000028      | 1.14      | 1.07         | 1.22         | 1.14(1.07,1.22)            |
| TCGA-ACC(N=77)     | 0.0004        | 1.38      | 1.15         | 1.66         | 1.38(1.15,1.66)            |
| TCGA-KIRC(N=515)   | 0.00047       | 1.14      | 1.06         | 1.22         | 1.14(1.06,1.22)            |
| TCGA-LIHC(N=341)   | 0.0059        | 1.11      | 1.03         | 1.20         | 1.11(1.03,1.20)            |
| TCGA-BLCA(N=398)   | 0.0075        | 1.08      | 1.02         | 1.15         | 1.08(1.02,1.15)            |
| TCGA-TGCT(N=128)   | 0.03          | 2.98      | 1.04         | 8.51         | 2.98(1.04,8.51)            |
| TCGA-PAAD(N=172)   | 0.07          | 1.11      | 0.99         | 1.24         | 1.11(0.99,1.24)            |
| TCGA-SKCM(N=444)   | 0.02          | 0.94      | 0.89         | 0.99         | 0.94(0.89,0.99)            |
| TCGA-SKCM-M(N=347) | 0.04          | 0.94      | 0.89         | 1.00         | 0.94(0.89,1.00)            |
| <b>SNAI1</b>       |               |           |              |              |                            |
| <b>CancerCode</b>  | <b>pvalue</b> | <b>HR</b> | <b>Lower</b> | <b>Upper</b> | <b>Hazard Ratio(95%CI)</b> |
| TCGA-GBMLGG(N=615) | 2.4E-29       | 1.51      | 1.41         | 1.63         | 1.51(1.41,1.63)            |
| TCGA-LGG(N=474)    | 3E-08         | 1.39      | 1.23         | 1.56         | 1.39(1.23,1.56)            |
| TCGA-KIPAN(N=855)  | 0.000007      | 1.19      | 1.10         | 1.29         | 1.19(1.10,1.29)            |
| TCGA-THCA(N=501)   | 0.000019      | 2.45      | 1.64         | 3.65         | 2.45(1.64,3.65)            |
| TCGA-LUSC(N=468)   | 0.0039        | 1.20      | 1.06         | 1.36         | 1.20(1.06,1.36)            |
| TCGA-STES(N=547)   | 0.0043        | 1.19      | 1.06         | 1.34         | 1.19(1.06,1.34)            |
| TCGA-KIRP(N=276)   | 0.0053        | 1.28      | 1.08         | 1.52         | 1.28(1.08,1.52)            |
| TCGA-BLCA(N=398)   | 0.0075        | 1.15      | 1.04         | 1.27         | 1.15(1.04,1.27)            |
| TCGA-BRCA(N=1044)  | 0.0074        | 1.80      | 1.16         | 2.79         | 1.80(1.16,2.79)            |
| TCGA-LUAD(N=490)   | 0.02          | 1.16      | 1.03         | 1.31         | 1.16(1.03,1.31)            |
| TCGA-STAD(N=372)   | 0.02          | 1.21      | 1.03         | 1.41         | 1.21(1.03,1.41)            |

| TCGA-HNSC(N=509)     | 0.02    | 1.14 | 1.02  | 1.27  | 1.14(1.02,1.27)     |
|----------------------|---------|------|-------|-------|---------------------|
| TCGA-CESC(N=273)     | 0.03    | 1.19 | 1.02  | 1.39  | 1.19(1.02,1.39)     |
| TCGA-COADREAD(N=372) | 0.03    | 1.29 | 1.02  | 1.62  | 1.29(1.02,1.62)     |
| TCGA-COAD(N=278)     | 0.04    | 1.31 | 1.01  | 1.69  | 1.31(1.01,1.69)     |
| <b>SNAI2</b>         |         |      |       |       |                     |
| CancerCode           | pvalue  | HR   | Lower | Upper | Hazard Ratio(95%CI) |
| TCGA-GBMLGG(N=619)   | 4.8E-41 | 1.71 | 1.58  | 1.86  | 1.71(1.58,1.86)     |
| TCGA-LGG(N=474)      | 2.3E-10 | 1.57 | 1.36  | 1.80  | 1.57(1.36,1.80)     |
| TCGA-KIPAN(N=855)    | 1.7E-06 | 1.20 | 1.12  | 1.30  | 1.20(1.12,1.30)     |
| TCGA-LUAD(N=490)     | 0.00033 | 1.23 | 1.10  | 1.37  | 1.23(1.10,1.37)     |
| TCGA-MESO(N=84)      | 0.00055 | 1.39 | 1.15  | 1.68  | 1.39(1.15,1.68)     |
| TCGA-PAAD(N=172)     | 0.0041  | 1.25 | 1.07  | 1.45  | 1.25(1.07,1.45)     |
| TCGA-KIRP(N=276)     | 0.0059  | 1.28 | 1.07  | 1.52  | 1.28(1.07,1.52)     |
| TCGA-STAD(N=372)     | 0.0075  | 1.20 | 1.05  | 1.37  | 1.20(1.05,1.37)     |
| TCGA-ACC(N=77)       | 0.0078  | 1.41 | 1.09  | 1.82  | 1.41(1.09,1.82)     |
| TCGA-KICH(N=64)      | 0.01    | 1.96 | 1.17  | 3.30  | 1.96(1.17,3.30)     |
| TCGA-SKCM(N=444)     | 0.03    | 1.11 | 1.01  | 1.22  | 1.11(1.01,1.22)     |
| TCGA-BLCA(N=398)     | 0.03    | 1.11 | 1.01  | 1.21  | 1.11(1.01,1.21)     |
| <b>SNAI3</b>         |         |      |       |       |                     |
| CancerCode           | pvalue  | HR   | Lower | Upper | Hazard Ratio(95%CI) |
| TCGA-LAML(N=209)     | 0.0054  | 1.20 | 1.05  | 1.36  | 1.20(1.05,1.36)     |
| TCGA-COADREAD(N=372) | 0.06    | 1.19 | 0.99  | 1.42  | 1.19(0.99,1.42)     |
| TCGA-LUAD(N=490)     | 0.00039 | 0.77 | 0.67  | 0.89  | 0.77(0.67,0.89)     |
| TCGA-CESC(N=273)     | 0.0015  | 0.72 | 0.59  | 0.88  | 0.72(0.59,0.88)     |
| TCGA-SKCM(N=444)     | 0.0037  | 0.87 | 0.79  | 0.96  | 0.87(0.79,0.96)     |
| TCGA-PAAD(N=172)     | 0.01    | 0.79 | 0.65  | 0.95  | 0.79(0.65,0.95)     |
| TCGA-SARC(N=254)     | 0.03    | 0.82 | 0.68  | 0.98  | 0.82(0.68,0.98)     |
| TCGA-SKCM-M(N=347)   | 0.05    | 0.90 | 0.81  | 1.00  | 0.90(0.81,1.00)     |
| TCGA-SKCM-P(N=97)    | 0.06    | 0.72 | 0.51  | 1.02  | 0.72(0.51,1.02)     |
